# Supplementary material for: HDAC9 structural variants disrupting TWIST1 transcriptional regulation lead to craniofacial and limb malformations
Source: PubMed Central journal article supplement — Genome Res. 2022 Jul;32(7):1242–53. doi: 10.1101/gr.276196.121 (PMC9341515; doi:10.1101/gr.276196.121), 2022-07
Supplement: supp_gr.276196.121_Supplemental_material.pdf [file supp_gr.276196.121_Supplemental_material.pdf]

## Supplemental Material

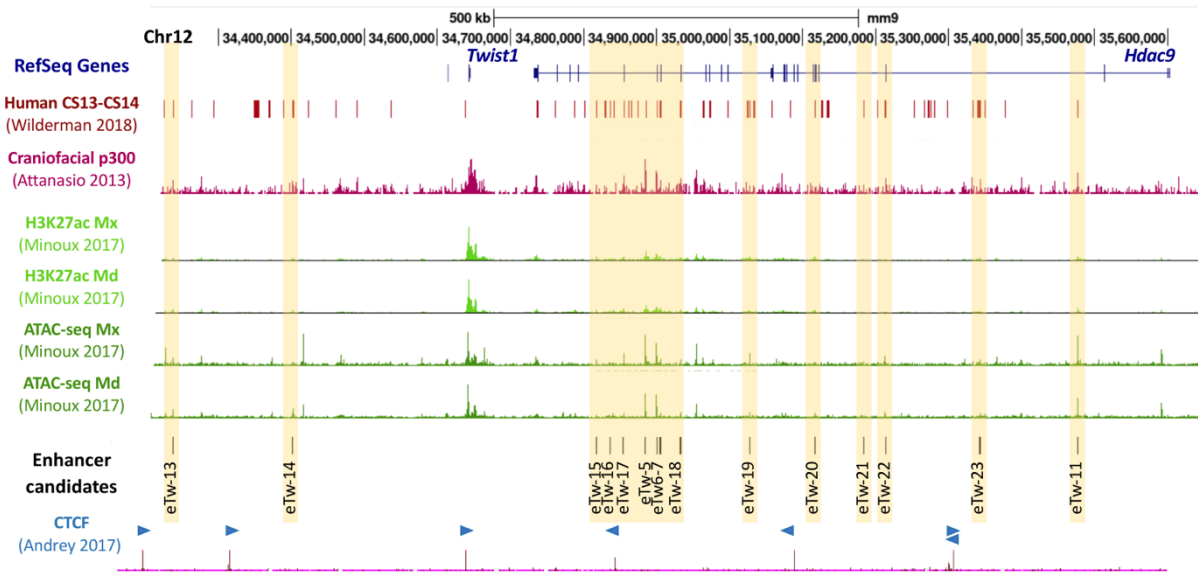

**Supplementary Figure 1. 15 enhancer candidates at the *Twist1-Hdac9* locus.** UCSC genome browser tracks of enhancer-associated marks from early human embryonic craniofacial tissues (stages CS13-CS14) (Wilderman, 2018); p300 ChIP-seq from mouse E11.5 craniofacial tissues (Attanasio et al., 2013); H3K27ac ChIP-seq and ATAC-seq from the maxilla (Mx) and mandibula (Md) E11.5 mouse embryos (Minoux et al. 2017). Selected enhancer candidates are marked by a yellow rectangle. CTCF ChIP-seq from mouse E11.5 limb bud (Andrey et al., 2017). Blue triangles marked bound CTCF site and its directionality.

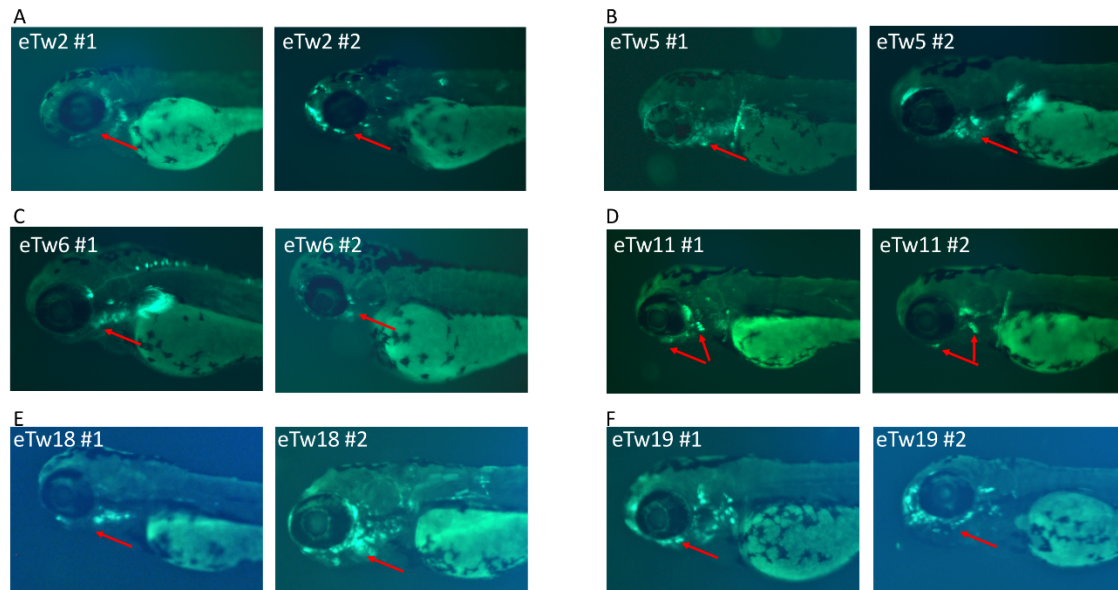

**Supplementary Figure 2. Functional craniofacial enhancers in the HDAC9-TWIST1 locus characterized using zebrafish. (A)** eTw-2 drives GFP expression in branchial arches 1-2. **(B)** eTw-5 drives GFP expression in the nasal pit and branchial arches 1-7. **(C)** eTw-6 drives GFP expression in the branchial arches 1-2. **(D)** eTw-11 drives GFP expression in the branchial arches 3-7. **(E)** eTw-18 drives GFP expression in the pharyngeal arches. **(F)** eTw-19 drives GFP expression in the mandibular, nasal pit, and branchial arches (red arrows). The GFP expression drove by each enhancer (red arrows) is represented by two different fish at 72hpf.

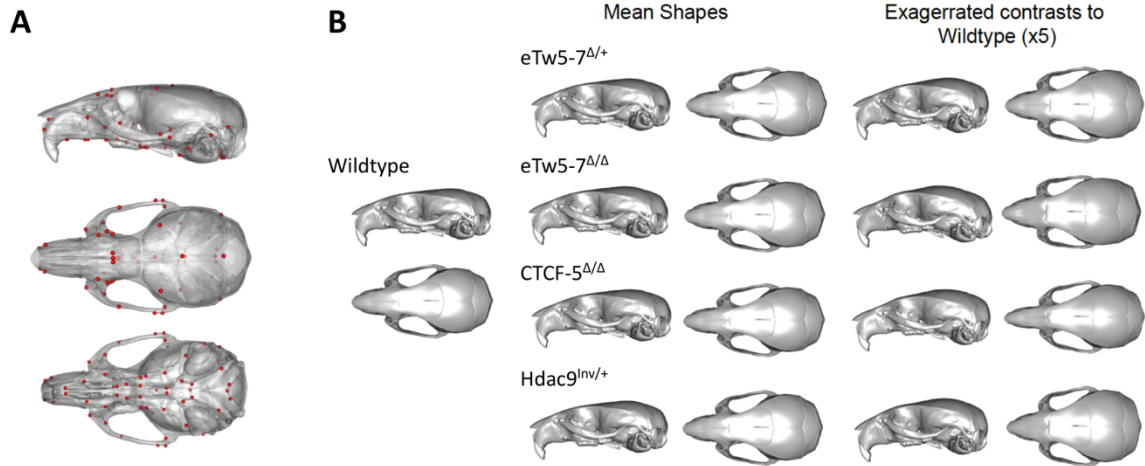

**Supplementary Figure 3. Skull size and shape of mouse models for *Twist1* regulatory elements (A)** 68 standardized skeletal landmarks (red dots) used to quantify 3D craniofacial form (shape and size) from micro-CT scans. **(B)** 3D morphs from micro-CT data of eTw5-7<sup>Δ/Δ</sup>, eTw5-7<sup>Δ/+</sup>, CTCF-5<sup>Δ/Δ</sup>, and Hdac9<sup>INV/+</sup> mice compared to wild-type show the differences in mean skull shape that also demonstrated by exaggerated contrasts of each model to wildtype (×5).

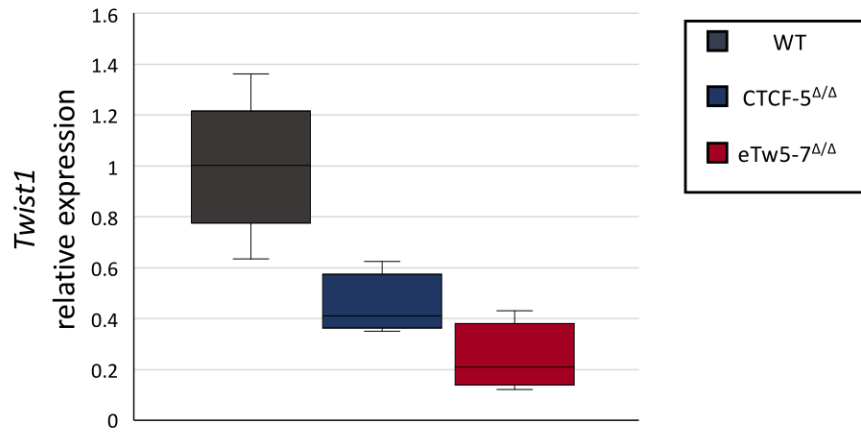

**Supplementary Figure 4: *Twist1* expression levels in mouse E11.5 branchial arches.** mRNA expression levels of *Twist1* in wildtype, CTCF-5 $\Delta/\Delta$  and eTw5-7 $\Delta/\Delta$  are normalized to beta-actin expression ( $p < 0.05$ , Student's *t*-test).

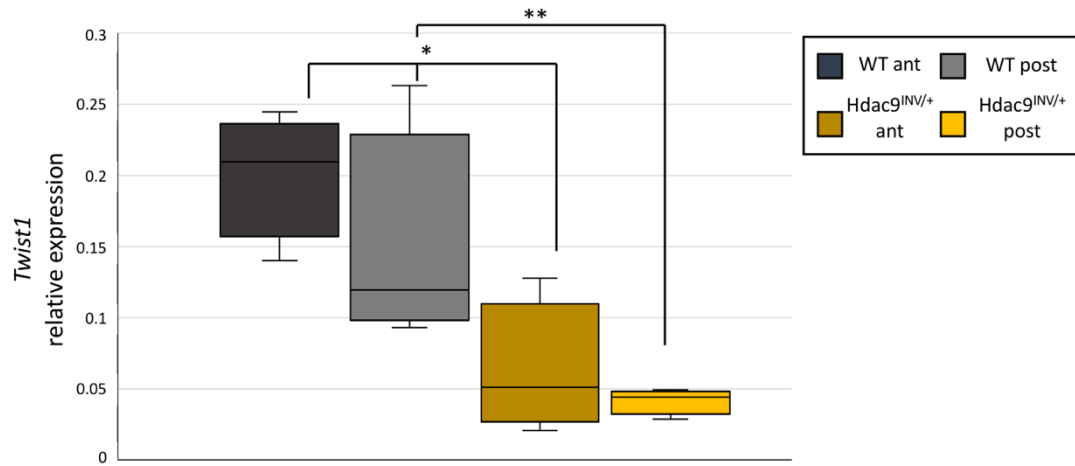

**Supplementary Figure 5: *Twist1* expression in E11.5 HL of *Hdac9*<sup>INV/+</sup> and WT mouse embryos.** mRNA expression levels of *Twist1* are normalized to beta-actin expression ( $p < 0.05$ , Student's *t*-test).

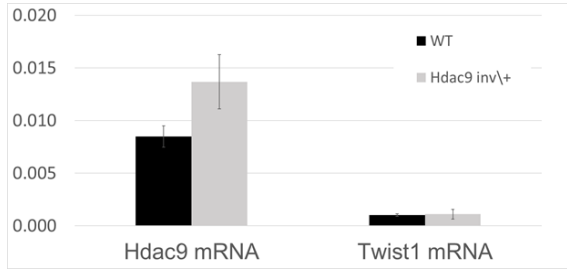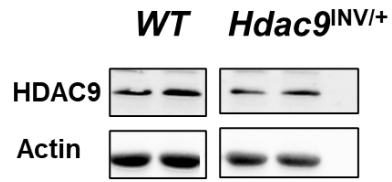

**Supplementary Figure 6: Hdac9 expression levels in adult mouse brain. (A)** mRNA expression levels of Hdac9 and Twist1 of adult mouse brains of wild type and *Hdac9*<sup>inv/+</sup>. **(B)** Western blot analysis of Hdac9 protein level in adult mouse brains of wild type and *Hdac9*<sup>inv/+</sup> (Anti-Hdac9; ab59718).

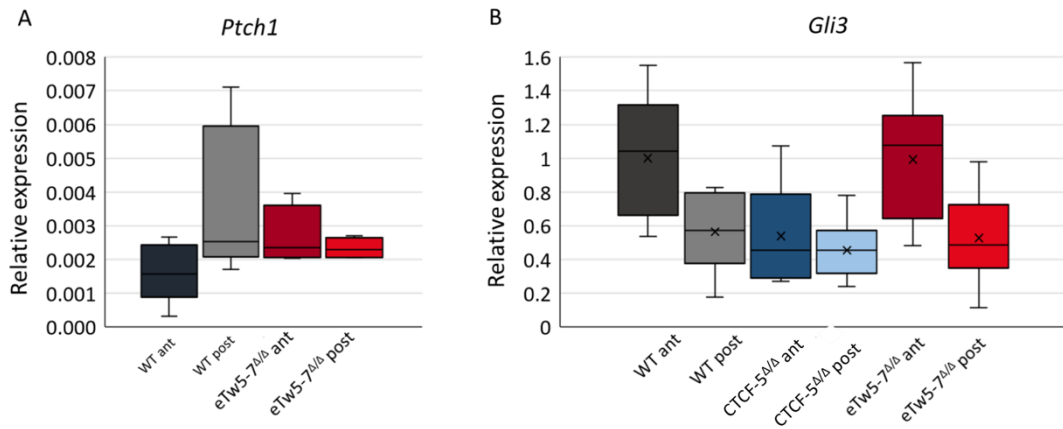

**Supplementary Figure 7: Expression pattern of Shh pathway genes. (A)** mRNA expression levels of *Ptch1* in HL of E11.5 WT and eTw5-7<sup>Δ/Δ</sup> mouse embryos. **(B)** mRNA expression levels of *Gli3* in HL of E11.5 WT, eTw5-7<sup>Δ/Δ</sup> and CTCF-5<sup>Δ/Δ</sup> mouse embryos.

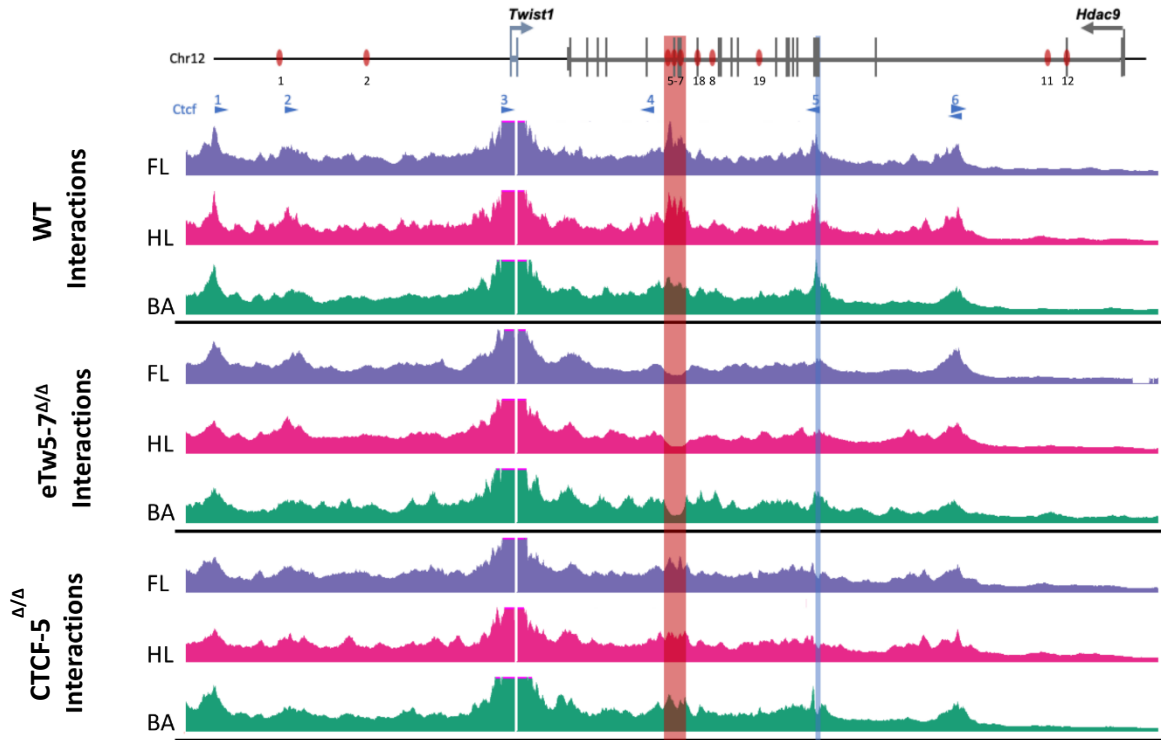

**Supplementary Figure 8: UMI-4C data representing chromatin looping in the *Hdac9*-*Twist1* locus.** UMI-4C tracks of merged (from two biological replicates) of WT E11.5 forelimb (FL), Hindlimb (HL), and Branchial arch (BA) demonstrate that *Twist1* interaction patterns are largely conserved between limb buds and branchial arch. The *Twist1* promoter serves as a viewpoint. Targeted *eTw5-7* and CTCF-5 regions are indicated by red and blue dash rectangles, respectively.



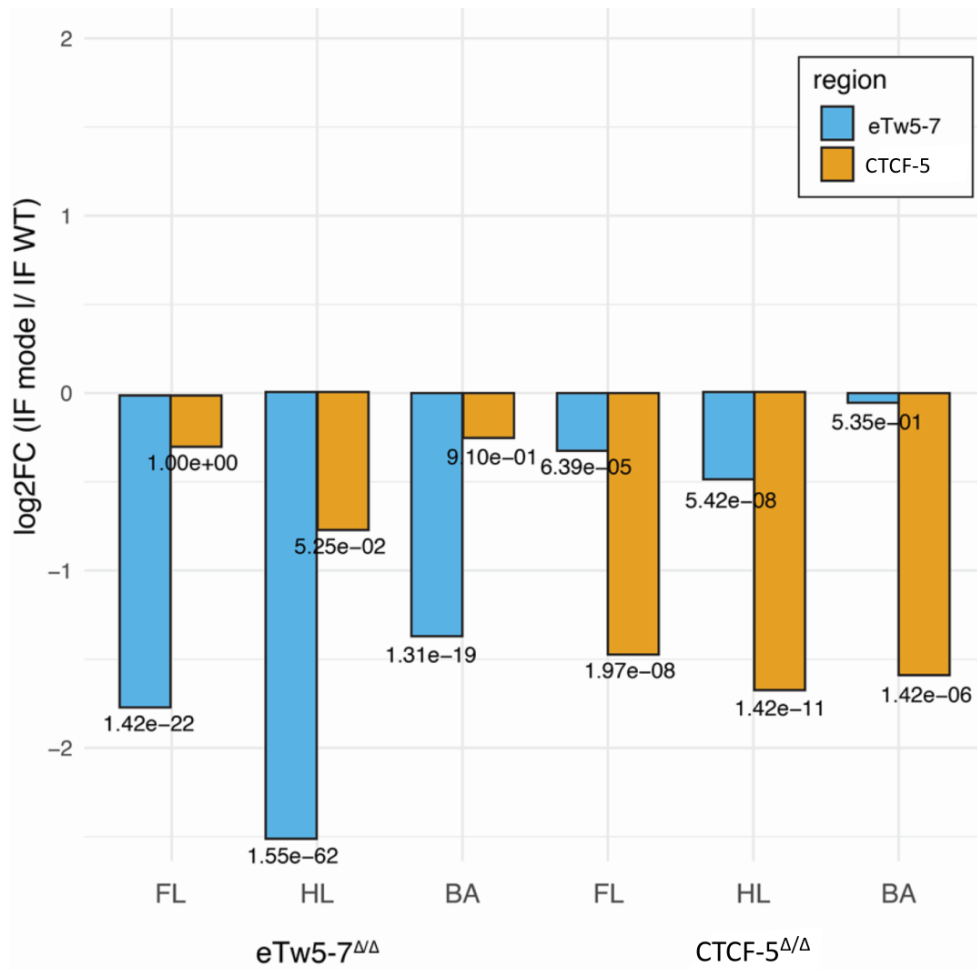

**Supplementary Figure 9: Differential interaction frequencies of eTw5-7 and CTCF-5 site regions with Twist1 promoter in our mouse models.** Log2 fold changes (FC) of the interaction frequency (IF) of Twist1 promoter and eTw5-7 region or CTCF-5 region in wildtype versus eTw5-7<sup>ΔΔ</sup> or CTCF-5<sup>ΔΔ</sup> mice. Log2 fold changes of interaction frequencies from UMI-4C are presented for forelimb (FL), hindlimb (HL), branchial arch (BA). Statistical significance (P-value) of differential interactions was tested for these two loci (eTw5-7: Chr12:34883878-34906858, CTCF-5: Chr12:35116684-35117991, mm9) using a Chi-square test within the UMI-4C R package (p4cIntervalsMean function).

**Supplementary Movie 1:** Centroid size and shape of eTw5-7<sup>ΔΔ</sup> (superior view). Here, the vector of landmark by landmark shape differences is used to quantify the difference between each genotype and the wildtype mean. Movies S1-S6 show an exaggeration (from 0-10×) of this shape difference vector to visualize the anatomical direction and distribution of shape effects by genotype.

**Supplementary Movie 2:** Centroid size and shape of eTw5-7<sup>ΔΔ</sup> (side view).

**Supplementary Movie 3:** Centroid size and shape of CTCF-5<sup>ΔΔ</sup> (superior view).

**Supplementary Movie 4:** Centroid size and shape of CTCF-5<sup>ΔΔ</sup> (side view).

**Supplementary Movie 5:** Centroid size and shape of Hdac9<sup>INV/+</sup> (superior view).

**Supplementary Movie 6:** Centroid size and shape of Hdac9<sup>INV/+</sup> (side view).
