# Supplementary material for: HDAC9structural variants disruptingTWIST1transcriptional regulation lead to craniofacial and limb malformations
Source: HighWire-hosted journal article supplement (doi:10.1101/gr.276196.121), 2022-06-16
Supplement: Supplemental_Table_S1.xlsx.xlsx [file Supplemental_Table_S1.xlsx.xlsx]

## Sheet: Sheet1
	Table S1: 15 craniofacial enhancer candidates at the HDAC9-TWIST1 locus
	Name	Human Genomic position (hg19)	mouse Genomic position (mm9)	Type (based on NM_058176)	Size (bp)
1	eTw2*	Chr7:19407932-19408549	Chr12:34416711-34417304	Intergenic	617
2	eTw5*	Chr7:18885970-18887229	Chr12:34,884,496-34,885,742	Intron 20	1260
3	eTw6*	Chr7:18874267-18875368	Chr12:34,900,126-34,901,231	Exon 19, introns 18-19	1102
4	eTw11*	Chr7:18252320-18253070	Chr12:35,476,648-35,477,376	Intergenic	750
5	eTw13	Chr7:19577279-19578409	Chr12:34238286-34239391	Intergenic	1131
6	eTw14	Chr7:19417014-19418512	Chr12:34401724-34403227	Intergenic	1499
7	eTw15	Chr7:18954896-18956568	Chr12:34817531-34819040	Intron 21	1673
8	eTw16	Chr7:18934027-18936572	Chr12:34835960-34837508	Intron 21	2546
9	eTw17	Chr7:18913392-18914585	Chr12:34854505-34855754	Exon 21, introns 20-21	1194
10	eTw18	Chr7:18832341-18833952	Chr12:34932251-34933888	Exon 16, Introns 15-16	1612
11	eTw19	Chr7:18737675-18738849	Chr12:35027281-35028407	Intron 11	1175
12	eTw20	Chr7:18629918-18630996	Chr12:35116966-35118136	Exon 3, intron 3	1079
13	eTw21	Chr7:18559965-18561240	Chr12:35183264-35184543	Intron 1	1276
14	eTw22	Chr7:18534641-18536043	Chr12:35213053-35214475	HDAC9 5' UTR	1403
15	eTw23	Chr7:18391610-18393296	Chr12:35342160-35343772	Intergenic	1687
	*charcterized enhancer candidates from Hirsch et al., 2018.
