# Supplementary material for: HDAC9structural variants disruptingTWIST1transcriptional regulation lead to craniofacial and limb malformations
Source: HighWire-hosted journal article supplement (doi:10.1101/gr.276196.121), 2022-06-16
Supplement: Supplemental_Table_S2.xlsx.xlsx [file Supplemental_Table_S2.xlsx.xlsx]

## Sheet: Sheet1
Table S2: Zebrafish enhancer assay
		Positive GFP embryos at 72hpf
Enhancer	Injected embryos	Pectoral fin		Branchial arch		Caudal fin		Brain/ Nervous system		Heart		Somitic muscles		Otic vesicle
*eTw_1	104	19	0.182692	6	0.0576923	65	0.625	22	0.211538	26	0.25	25	0.240385	-	-
*eTw_2	171	5	0.0292398	50	0.292398	5	0.0292398	-	-	-	-	-	-	-	-
*eTw_3	102	-	-	-	-	3	0.0294118	4	0.0392157	-	-	6	0.0588235	-	-
*eTw_4	113	14	0.123894	8	0.0707965	12	0.106195	5	0.0442478	28	0.247788	33	0.292035	-	-
*eTw_5	137	46	0.335766	53	0.386861	72	0.525547	25	0.182482	48	0.350365	96	0.70073	-	-
*eTw_6	152	32	0.210526	119	0.782895	13	0.0855263	-	-	-	-	-	-	-	-
*eTw_7	229	8	0.0349345	-	-	-	-	-	-	-	-	-	-	-	-
*eTw_8	149	45	0.302013	87	0.583893	5	0.033557	41	0.275168	28	0.187919	27	0.181208	-	-
*eTw_9	93	25	0.268817	-	-	51	0.548387	-	-	-	-	-	-	-	-
*eTw_10	92	-	-	-	-	-	-	-	-	-	-	-	-	-	-
*eTw_11	126	49	0.388889	38	0.301587	8	0.0634921	19	0.150794	15	0.119048	21	0.166667	62	0.492063
*eTw_12	128	-	-	-	-	-	-	-	-	-	-	-	-	-	-
eTw_13	109	-	-	-	-	2	0.02	2	0.02	2	0.02	2	0.02	-	-
eTw_14	101	1	0.01	22	0.21	11	0.108	75	0.74	21	0.2	78	0.77	-	-
eTw_15	107	2	0.018	13	0.12	1	0.0093	4	0.037	2	0.0186	1	0.0093	4	0.037
eTw_16	115	4	0.03	7	0.06	22	0.19	1	0.008	42	0.365	1	0.008	3	0.026
eTw_17	160	-	-	-	-	-	-	-	-	-	-	-	-	-	-
eTw_18	112	-	-	44	0.39	1	0.008	14	0.125	-	-	25	0.22	8	0.07
eTw_19	91	1	0.01	62	0.68	14	0.15	2	0.02	2	0.02	7	0.076	1	0.01
eTw_20	71	2	0.028	14	0.19	15	0.21	3	0.042	3	0.04	11	0.15	-	-
eTw_21	152	4	0.026	22	0.14	7	0.04	33	0.217	40	0.26	82	0.54	4	0.02
eTw_22	93	-	-	9	0.1	-	-	3	0.044	12	0.13	43	0.47	-	-
eTw_23	105	-	-	-	-	-	-	-	-	-	-	-	-	-	-
*charcterized enhancer candidates from Hirsch et al., 2018.
