# Supplementary material for: HDAC9structural variants disruptingTWIST1transcriptional regulation lead to craniofacial and limb malformations
Source: HighWire-hosted journal article supplement (doi:10.1101/gr.276196.121), 2022-06-16
Supplement: Supplemental_Table_S3.xlsx.xlsx [file Supplemental_Table_S3.xlsx.xlsx]

## Sheet: Table S3
Table S3. Patients with structural and nucleotide variants in the HDAC9-TWIST1 locus
HDAC9 deletions	Chr. (hg19)	strart	end	type	size (Kb)	phenotype
Patient 1 (Yoon et al. 2019)	Chr7	17298947	19057664	Deletion	1759	Craniosynostosis, isolated sagittal and bilateral coronal CRS with facial characteristics of Saethre–Chotzen syndrome.
Patient 2	Chr7	18478923	18815377	Deletion	336	A young old boy with craniosynostosis (bilateral premature fusion of the coronal sutures, underwent surgery at 6 months) and facial anomalies
Patient 3	Chr7	18562544	18963201	Deletion	401	Craniosynostosis: scaphocephaly with anomalies of the anterior and posterior fossa; no ventricular dilatation; no parenchymal anomalies
Patient 5 (Lang et al. 2012)	Chr7	17674100	18634682	Deletion	961	Schizophrenia
Patient 6 (Lang et al. 2012)	Chr7	18374606	18498502	Deletion	124	Schizophrenia
Patient 7 (Lang et al. 2012)	Chr7	18595436	18707719	Deletion	112	Schizophrenia
Translocation	Chr.	strart	end		size	phenotype
Patient 4 (De Marco, et al. 2011)	Chr7	19112906	19112965	Translocation	t(7;12)(p21.2;p12.3)	A female presented with brachycephaly with flat occipitus, ocular hypertelorism, broad nose with low nasal bridge, low-set ears, thin lower lip and small mandible. There were no associated features of the hands or feet such as syndactyly, brachydactyly, or broad first rays. The patients underwent to cranioplasty at 18-months-old.
HDAC9 single nucleotide variants	Chr.	strart	end		size	phenotype
Patient 8	Chr7	18631238	18631289	Splice site	c.542+1G>A	Autism, global developmental delays, failure to thrive and seizures, maternally-inherited HDAC9 splice-site variant. No cranosynostosis or limb malformation.
Patient 9	Chr7	18687535	18687536	Frame shift	De novo, c.1166delA, p.Lys389 fs	A young male with learning impairment. Brain MRI: thin corpus callosum, septum pellucidum cyst. Also, some dysmprphic features: short stature, prominent forehead, triangular facies, prominent eyes, hypertelorism, flat phiitrum, thin upper lip.
Patient 10	Chr7	18869144	18869145	Missense	Homozygous SNV, T\G, p.N813K	Young female, born from a consanguineous marriage, severe epilepsy of neonatal onset. No craniofaciel or limb phenotype.
