# Supplementary material for: HDAC9structural variants disruptingTWIST1transcriptional regulation lead to craniofacial and limb malformations
Source: HighWire-hosted journal article supplement (doi:10.1101/gr.276196.121), 2022-06-16
Supplement: Supplemental_Table_S5.xlsx.xlsx [file Supplemental_Table_S5.xlsx.xlsx]

## Sheet: Sheet1
Supplementary Table 5: Mixed model ANOVA for fluctuating asymmetry for the pooled sample.
Fluctuating Asymmetry (FA) ANOVA
	Df	SS	MS	Rsq	F	Z	Pr(>F)
ind	161	0.1962	0.0012	0.5751	2.46	15.75	0.001	**
side	1	0.0654	0.0653	0.1915	132.11	7.17	0.001	**
FA (ind * side)	161	0.0796	0.0005	0.2334
Total	323	0.3412
