# Supplementary material for: HDAC9structural variants disruptingTWIST1transcriptional regulation lead to craniofacial and limb malformations
Source: HighWire-hosted journal article supplement (doi:10.1101/gr.276196.121), 2022-06-16
Supplement: Supplemental_Table_S6.xlsx.xlsx [file Supplemental_Table_S6.xlsx.xlsx]

## Sheet: Sheet1
Supplementary Table 6: Pairwise absolute differences between asymmetry variances
	eTw5-7 Δ/+	eTw5-7Δ/Δ	CTCFΔ/Δ	Hdac9INV/+
eTw5-7 Δ/+
eTw5-7Δ/Δ	0.000204
CTCFΔ/Δ	0.000197	7e-06
Hdac9INV/+	6.6e-05	0.000138	0.000131
Wildtype	0.00026	5.6e-05	6.3e-05	0.000194
P-Values
	eTw5-7 Δ/+	eTw5-7Δ/Δ	CTCFΔ/Δ	Hdac9INV/+
eTw5-7 Δ/+
eTw5-7Δ/Δ	0.04
CTCFΔ/Δ	0.06	0.93
Hdac9INV/+	0.54	0.1	0.13
Wildtype	0.03	0.57	0.54	0.05
